1 **Structure-based drug design, virtual screening and high-throughput**  
2 **screening rapidly identify antiviral leads targeting COVID-19**

3 Zhenming Jin<sup>1,2,9</sup>, Xiaoyu Du<sup>2,9</sup>, Yechun Xu<sup>3,9</sup>, Yongqiang Deng<sup>4,9</sup>, Meiqin Liu<sup>5,9</sup>, Yao  
4 Zhao<sup>1</sup>, Bing Zhang<sup>1</sup>, Xiaofeng Li<sup>4</sup>, Leike Zhang<sup>5</sup>, Yinkai Duan<sup>1</sup>, Jing Yu<sup>1</sup>, Lin Wang<sup>1</sup>,  
5 Kailin Yang<sup>6</sup>, Fengjiang Liu<sup>1</sup>, Tian You<sup>1</sup>, Xiaoce Liu<sup>1</sup>, Xiuna Yang<sup>1</sup>, Fang Bai<sup>1</sup>, Hong Liu<sup>3</sup>,  
6 Xiang Liu<sup>7</sup>, Luke W. Guddat<sup>8</sup>, Gengfu Xiao<sup>5</sup>, Chengfeng Qin<sup>4</sup>, Zhengli Shi<sup>5</sup>, Hualiang  
7 Jiang<sup>1,3\*</sup>, Zihao Rao<sup>1,2,7\*</sup> & Haitao Yang<sup>1\*</sup>

8 <sup>1</sup>Shanghai Institute for Advanced Immunochemical Studies and School of Life Science and  
9 Technology, ShanghaiTech University, Shanghai, China.

10 <sup>2</sup>School of Life Sciences, Tsinghua University, Beijing, China.

11 <sup>3</sup>Drug Discovery and Design Center, Shanghai Institute of Materia Medica, Chinese  
12 Academy of Sciences, Shanghai, China.

13 <sup>4</sup>Department of Virology, State Key Laboratory of Pathogen and Biosecurity, Beijing  
14 Institute of Microbiology and Epidemiology, Academy of Military Medical Sciences,  
15 Beijing, China.

16 <sup>5</sup>CAS Key Laboratory of Special Pathogens, Wuhan Institute of Virology, Center for  
17 Biosafety Mega-Science, Chinese Academy of Sciences, Wuhan, China.

18 <sup>6</sup>Taussig Cancer Center, Cleveland Clinic, Cleveland, USA.

19 <sup>7</sup>State Key Laboratory of Medicinal Chemical Biology, Frontiers Science Center for Cell  
20 Response, College of Life Sciences, College of Pharmacy, Nankai University, Tianjin,  
21 China.

22 <sup>8</sup>School of Chemistry and Molecular Biosciences, The University of Queensland, Brisbane,  
23 QLD 4072, Australia.

24 <sup>9</sup>These authors contributed equally: Zhenming Jin, Xiaoyu Du, Yechun Xu, Yongqiang  
25 Deng, Meiqin Liu.

26 \*e-mail: hljiang@simm.ac.cn; raozh@tsinghua.edu.cn; yanght@shanghaitech.edu.cn

27

28 **Abstract**

29 A coronavirus identified as 2019 novel coronavirus (COVID-19) is the etiological agent  
30 responsible for the 2019-2020 viral pneumonia outbreak that commenced in Wuhan<sup>1-4</sup>.  
31 Currently there is no targeted therapeutics and effective treatment options remain very  
32 limited. In order to rapidly discover lead compounds for clinical use, we initiated a program  
33 of combined structure-assisted drug design, virtual drug screening, and high-throughput  
34 screening to identify new drug leads that target the COVID-19 main protease (M<sup>pro</sup>). M<sup>pro</sup>  
35 is a key coronavirus enzyme, which plays a pivotal role in mediating viral replication and  
36 transcription, making it an attractive drug target for this virus<sup>5,6</sup>. Here, we identified a  
37 mechanism-based inhibitor, N3, by computer-aided drug design and subsequently  
38 determined the crystal structure of COVID-19 M<sup>pro</sup> in complex with this compound. Next,  
39 through a combination of structure-based virtual and high-throughput screening, we  
40 assayed over 10,000 compounds including approved drugs, drug candidates in clinical  
41 trials, and other pharmacologically active compounds as inhibitors of M<sup>pro</sup>. Seven of these  
42 inhibit M<sup>pro</sup> with IC<sub>50</sub> values ranging from 0.48 to 16.62  $\mu$ M. Ebselen, thiadiazolidinone-8  
43 (TDZD-8) and N3 also exhibited strong antiviral activity in cell-based assays. Our results  
44 demonstrate the efficacy of this screening strategy, and establishes a new paradigm for the  
45 rapid discovery of drug leads with clinical potential in response to new infectious diseases  
46 where no specific drugs or vaccines are available.

47

48 An epidemic of contagious pneumonia has been spreading rapidly from its likely origin in  
49 Central China since December 2019<sup>1,2</sup>. The infectious pneumonia is now found in all  
50 provinces of China, with cases also confirmed in other 35 countries. As of February 25,  
51 2020, around 80,000 people were infected and over 2,500 have succumbed to the  
52 epidemic<sup>7,8</sup>. Symptoms associated with this disease include fever, cough, myalgia or  
53 fatigue and dyspnea<sup>9,10</sup>. The World Health Organization announced that the outbreak of this  
54 deadly and fast-spreading infectious pneumonia constitutes a global health emergency<sup>8</sup>. A  
55 coronavirus named 2019 novel coronavirus (COVID-19), has been identified as the  
56 etiological agent responsible for the outbreak<sup>3,4</sup>. At present, there are no targeted  
57 therapeutics and effective treatment options remain very limited.

58 CoVs infect humans and other animal species, causing a variety of highly prevalent and  
59 severe diseases, including Severe Acute Respiratory Syndrome (SARS) and Middle East  
60 Respiratory Syndrome (MERS)<sup>11</sup>. CoVs are positive-sense, single-stranded RNA viruses  
61 featuring the largest viral RNA genomes known to date<sup>12</sup>. The COVID-19 genome is  
62 comprised of ~30,000 nucleotides; its replicase gene encodes two overlapping polyproteins,  
63 pp1a and pp1ab, required for viral replication and transcription<sup>3,4</sup>. The functional  
64 polypeptides are released from the polyproteins by extensive proteolytic processing,  
65 predominantly by a 33.8-kDa main protease (M<sup>pro</sup>), also referred to as the 3C-like protease.  
66 M<sup>pro</sup> digests the polyprotein at no less than 11 conserved sites, starting with the autolytic  
67 cleavage of this enzyme itself from pp1a and pp1ab<sup>5</sup>. The functional importance of M<sup>pro</sup> in  
68 the viral life cycle, together with the absence of closely related homologues in humans,  
69 identify the M<sup>pro</sup> as an attractive target for antiviral drug design<sup>6</sup>.

70 To facilitate the rapid discovery of antiviral compounds with clinical potential, we

71 developed a strategy combining structure-assisted drug design, virtual drug screening and  
72 high-throughput screening to repurpose existing drugs to target M<sup>pro</sup>, which is a key  
73 enzyme for the viral life cycle. Our strategy has successfully identified several new  
74 compounds that showed both strong inhibition of the target enzyme and antiviral activity  
75 in cell-based assays. These studies pave the way for the further development of novel  
76 antiviral drugs against this CoV.

### 77 **Establishing a high-throughput activity assay**

78 Recombinant COVID-19 M<sup>pro</sup> with native N and C termini was expressed in *Escherichia*  
79 *coli* and subsequently purified (Extended Data Fig. 1a, b). The molecular weight of  
80 COVID-19 M<sup>pro</sup> as determined by mass spectroscopy is 33797.0 Da, consistent with its  
81 theoretical molecular weight 33796.8 Da. In order to characterize its enzymatic activity  
82 and to carry out high throughput screening of inhibitors, we developed a fluorescence  
83 resonance energy transfer (FRET) assay. To do this, a fluorescently labeled substrate,  
84 MCA-AVLQ↓SGFR-Lys(Dnp)-Lys-NH<sub>2</sub>, derived from the N-terminal auto-cleavage  
85 sequence of the viral protease was designed and synthesized for time-dependent kinetic  
86 analysis (Extended Data Fig. 1e). The catalytic efficiency ( $k_{cat}/K_m$ ) for COVID-19 M<sup>pro</sup> was  
87 measured to be 28,500 M<sup>-1</sup>s<sup>-1</sup> which is slightly higher than that for SARS-CoV M<sup>pro</sup>  
88 ( $k_{cat}/K_m=26,500$  M<sup>-1</sup>s<sup>-1</sup>)<sup>13</sup>, but over 30-fold higher than that of human rhinovirus 3C  
89 protease ( $k_{cat}/K_m=920$  M<sup>-1</sup>s<sup>-1</sup>)<sup>14</sup>.

### 90 **N3 is a potent irreversible inhibitor of COVID-19 M<sup>pro</sup>**

91 In a previous study, we designed a Michael acceptor inhibitor N3 using computer-aided  
92 drug design (CADD) (Extended Data Fig. 1c), which can specifically inhibit multiple CoV  
93 M<sup>pro</sup>s, including those from SARS-CoV and MERS-CoV<sup>15-18</sup>. It also has displayed potent

94 antiviral activity against infectious bronchitis virus in an animal model<sup>16</sup>. Next, we  
95 constructed a homology model for COVID-19 M<sup>pro</sup> and used molecular docking to see if  
96 N3 could target this new CoV M<sup>pro</sup>. A docking pose showed that it could fit inside the  
97 substrate-binding pocket. To assess the efficacy of N3 for COVID-19 M<sup>pro</sup>, kinetic analysis  
98 was performed<sup>15</sup>. A progress curve showed that it is time-dependent irreversible inhibitor  
99 of this enzyme. Further, the shape of this curve supports the mechanism of two-step  
100 irreversible inactivation. The inhibitor first associates with COVID-19 M<sup>pro</sup> (EI) with a  
101 dissociation constant  $K_i$ ; then, a stable covalent bond is formed between N3 and M<sup>pro</sup> (E-I).  
102 The evaluation of this time-dependent inhibition requires both the equilibrium-binding  
103 constant  $K_i$  (designated as  $k_2/k_1$ ) and the inactivation rate constant for covalent bond  
104 formation  $k_3$  (Extended Data Fig. 1d). However, N3 exhibits very potent inhibition of  
105 COVID-19 M<sup>pro</sup> (Extended Data Fig. 1e), such that measurement of  $K_i$  and  $k_3$  proved  
106 difficult. When very rapid inactivation occurs,  $k_{obs}/[I]$  was utilized to evaluate the inhibition  
107 as an approximation of the pseudo second-order rate constant  $(k_3/K_i)$ <sup>15</sup>. The value of  $k_{obs}/[I]$   
108 of N3 for COVID-19 M<sup>pro</sup> was determined to be  $11,300 \pm 880 \text{ M}^{-1}\text{s}^{-1}$ , suggesting this  
109 Michael acceptor has potent inhibition.

### 110 **The crystal structure of COVID-19 M<sup>pro</sup> in complex with N3**

111 In order to elucidate the inhibitory mechanism of this compound, we determined the crystal  
112 structure of COVID-19 M<sup>pro</sup> in complex with N3 to 2.1-Å resolution. The asymmetric unit  
113 contains only one polypeptide (Extended Data Table 1). However, two of these associate  
114 to form a dimer by a crystallographic 2-fold symmetry axis (the two molecules are  
115 designated protomer A and B) (Fig. 1b). All residues (residues 1–306) are visible in electron  
116 density maps. Each protomer is composed of three domains (Fig. 1a). Domains I (residues

117 8–101) and II (residues 102–184) have an antiparallel  $\beta$ -barrel structure. Domain III  
118 (residues 201–303) contains five  $\alpha$ -helices arranged into a largely antiparallel globular  
119 cluster, and is connected to domain II by means of a long loop region (residues 185–200).  
120 COVID-19 M<sup>pro</sup> has a Cys–His catalytic dyad, and the substrate-binding site is located in  
121 a cleft between Domain I and II. These features are similar to those of other M<sup>pro</sup>s reported  
122 previously<sup>5,16,18–20</sup>. The electron density map shows that N3 binds in the substrate-binding  
123 pocket in an extended conformation (Fig. 1c, Extended Data Fig. 2), with the inhibitor  
124 backbone atoms forming an antiparallel sheet with residues 164–168 of the long strand<sub>155-</sub>  
125 <sub>168</sub> on one side, and with residues 189–191 of the loop linking domains II and III.

126 Here we detail the specific interactions of N3 with M<sup>pro</sup> (Fig. 1c). The electron density  
127 shows that the S $\gamma$  atom of C145-A forms a covalent bond (1.8-Å) with the C $\beta$  of the vinyl  
128 group, confirming that the Michael addition has occurred (Fig. 1c, d). The S1 subsite has  
129 an absolute requirement for Gln at the P1 position. The side chains of F140-A, N142-A,  
130 E166-A, H163-A, H172-A, S1-B (from protomer B), and main chains of F140-A and L141-  
131 A are involved in S1 subsite formation, which also includes two ordered water molecules  
132 (named W1 and W2). The lactam at P1 inserts into the S1 subsite and forms a hydrogen  
133 bond with H163-A. The side chain of Leu at P2 site deeply inserts into the hydrophobic S2  
134 subsite, which consists of the side chains of H41-A, M49-A, Y54-A, M165-A, and the alkyl  
135 portion of the side chain of D187-A. The side chain of Val at P3 is solvent-exposed,  
136 indicating that this site can tolerate a wide range of functional groups. The side chain of  
137 Ala at P4 side is surrounded by the side chains of M165-A, L167-A, F185-A, Q192-A and  
138 the main chain of Q189-A, all of which form a small hydrophobic pocket. P5 makes van  
139 der Waals contacts with P168-A and the backbone of residues 190–191. The bulky benzyl

140 group extends into the S1' site, possibly forming van der Waals interactions with T24-A  
141 and T25-A. In addition, N3 forms multiple hydrogen bonds with the main chain of the  
142 residues in the substrate-binding pocket, which also helps lock the inhibitor inside the  
143 substrate-binding pocket (Fig. 1c, Extended Data Fig. 2).

#### 144 **Virtual screening**

145 The structure of COVID-19 M<sup>pro</sup> in complex with N3 provides a model for rapidly  
146 identifying lead inhibitors to target COVID-19 M<sup>pro</sup> through *in silico* screening. To achieve  
147 this, an in-house database of potential binding compounds was docked using Glide (version  
148 8.2) of Schrödinger 2019-1. The results show that cinanserin fits snugly into the substrate-  
149 binding pocket, by interacting with H41 and E166 of M<sup>pro</sup> by cation- $\pi$ . Subsequently we  
150 determined this compound has an IC<sub>50</sub> value of 124.93  $\mu$ M for M<sup>pro</sup>, which validated our  
151 virtual screening approach (Extended Data Fig. 3). Moreover, cinanserin is a well-  
152 characterized serotonin antagonist, which has undergone preliminary clinical testing in  
153 humans in the 1960s<sup>21</sup> and has previously been shown to inhibit SARS-CoV M<sup>pro</sup><sup>22</sup>. Thus,  
154 it has potential for further optimization as an anti-viral drug lead.

#### 155 **High-throughput screening**

156 Next, we used our FRET assay, to screen a library of ~10,000 compounds consisting of  
157 approved drugs, clinical trial drug candidates and natural products. Primary hits included  
158 seven compounds that are either FDA-approved drugs or clinical trial/preclinical drug  
159 candidates. We then determined their IC<sub>50</sub> values, which are in the range from 0.48 to 16.62  
160  $\mu$ M (Fig. 2). Amongst them, disulfiram and carmofur are FDA-approved drugs, whilst  
161 ebselen, TDZD-8, shikonin, tideglusib, and PX-12 are currently in clinical trials or  
162 preclinical studies. Ebselen has the strongest inhibition of M<sup>pro</sup> activity with an IC<sub>50</sub> of 0.48

163  $\mu\text{M}$ . Since our structural data is only for N3, we investigated if molecular docking could  
164 predict how these inhibitors bind to this protein. In all cases, reasonable docking poses  
165 were found, demonstrating that they could fit inside the substrate-binding pocket (Extended  
166 Data Fig. 4).

### 167 **Antiviral activity assay**

168 To further substantiate the enzymatic inhibition results *in vitro*, we then evaluated the  
169 ability of these compounds to prevent cells from being infected by COVID-19. As shown  
170 in Fig. 3, ebselen, TDZD-8 and N3 showed the most potent antiviral effects at a  
171 concentration of 10  $\mu\text{M}$ , entirely preventing the cytopathic effect (CPE) in COVID-19-  
172 infected Vero cells. Quantitative real-time RT-PCR (qRT-PCR) demonstrated that treatment  
173 of ebselen reduced the amounts of COVID-19 20.3-fold compared with the treatment in  
174 the absence of inhibitor, and TDZD-8 and N3 exhibited 10.9-fold and 8.4-fold reduction in  
175 COVID-19 growth, respectively. Ebselen is an organoselenium compound with anti-  
176 inflammatory, anti-oxidant and cytoprotective properties. This compound has been  
177 investigated for the treatment of multiple diseases, such as bipolar disorders and hearing  
178 loss. The toxicity of ebselen in humans has been evaluated in a number of clinical trials<sup>23-</sup>  
179 <sup>25</sup>. These data strongly suggest the clinical potential of ebselen for CoV treatment. TDZD-  
180 8 was originally designed as a lead compound for the treatment of Alzheimer's disease,  
181 which has been shown to be effective in animal models<sup>26</sup>. It is also interesting that  
182 cinanserin displayed moderate inhibition against COVID-19 with an  $\text{IC}_{50}$  value of 20.61  
183  $\mu\text{M}$  (Extended Data Fig. 3), which is superior to that in the enzymatic inhibition assay,  
184 suggesting that cinanserin might have multi-drug targets in preventing viral infection.



185 **Discussion**

186 In the last twenty years, new infectious agents have emerged to cause epidemics, such as  
187 SARS and MERS<sup>11</sup>. The timely development of effective antiviral agents for clinical use  
188 is extremely challenging because conventional drug development approaches normally  
189 take years of investigations and cost billions of dollars<sup>27</sup>. The repurposing of approved  
190 pharmaceutical drugs and drug candidates provides an alternative approach to rapidly  
191 identify potential drug leads to manage rapidly emerging viral infections<sup>28</sup>. Cell-based  
192 phenotypic screening has proven to be valuable<sup>29</sup>, but the corresponding methodological  
193 complexity is not readily compatible with high-throughput pipelines, and fails to inform  
194 the identity of the molecular target or mechanism of action<sup>30</sup>. In this regard, we combined  
195 structure-based *ab initio* drug design, virtual screening and high-throughput screening to  
196 discover new drugs for treating COVID-19 infection. The convergence of these three  
197 approaches proved to be an efficient strategy in finding three lead compounds with good  
198 antiviral activity. Ebselen is of particular interest for further investigation since its safety  
199 in humans has been supported by different clinical trials<sup>23-25</sup>. Our methodology establishes  
200 a paradigm of rapid discovering drug leads with clinical potential in response to new  
201 emerging infectious diseases lacking specific drugs and vaccines.

202 The crystal structural and docking data have shown that these drug leads can bind to the  
203 substrate-binding pocket of COVID-19 M<sup>pro</sup>. In our previous study, we proposed that all  
204 the CoV M<sup>pro</sup>s share a highly conservative substrate-recognition pocket, which serves as a  
205 drug target for broad-spectrum inhibitor design<sup>15</sup>. Recent discovery of new CoVs and  
206 accumulation of structural data for CoV M<sup>pro</sup>s from various species provided the  
207 opportunity to further examine our previous hypothesis. Superposition of the 12 crystal

208 structures of M<sup>pro</sup><sub>15,16,18,20,31-35</sub> have shown that the most variable regions were the helical  
209 domain III and surface loops, but the substrate-binding pockets located in a cleft between  
210 domains I and II are still highly conserved among all CoV M<sup>pro</sup>s, suggesting the antiviral  
211 inhibitors targeting at this site should have wide-spectrum anti-CoV activity (Fig. 4). This  
212 strongly supports our hypothesis that development of a single antiviral agent could provide  
213 an effective first line of defense against all CoV-associated diseases.

214

## 215 **References**

- 216 1 Zhu, N. *et al.* A novel coronavirus from patients with pneumonia in China, 2019. *New England*  
217 *Journal of Medicine* (2020).
- 218 2 Qun Li *et al.* Early Transmission Dynamics in Wuhan, China, of Novel Coronavirus–Infected  
219 Pneumonia. *New England Journal of Medicine* (2020).
- 220 3 Zhou, P. *et al.* A pneumonia outbreak associated with a new coronavirus of probable bat origin.  
221 *Nature*, doi:10.1038/s41586-020-2012-7 (2020).
- 222 4 Wu, F. *et al.* A new coronavirus associated with human respiratory disease in China. *Nature*,  
223 doi:10.1038/s41586-020-2008-3 (2020).
- 224 5 Anand, K., Ziebuhr, J., Wadhwani, P., Mesters, J. R. & Hilgenfeld, R. Coronavirus main proteinase  
225 (3CL(pro)) structure: Basis for design of anti-SARS drugs. *Science* **300**, 1763-1767,  
226 doi:10.1126/science.1085658 (2003).
- 227 6 Pillaiyar, T., Manickam, M., Namasivayam, V., Hayashi, Y. & Jung, S. H. An Overview of Severe  
228 Acute Respiratory Syndrome-Coronavirus (SARS-CoV) 3CL Protease Inhibitors: Peptidomimetics  
229 and Small Molecule Chemotherapy. *Journal of Medicinal Chemistry* **59**, 6595-6628,  
230 doi:10.1021/acs.jmedchem.5b01461 (2016).
- 231 7 National Health Commission, PRC. *Novel Coronavirus(2019-nCoV) Situation Report of China*,  
232 <[http://www.nhc.gov.cn/xcs/yqtb/list\\_gzbd.shtml](http://www.nhc.gov.cn/xcs/yqtb/list_gzbd.shtml)> (2020).
- 233 8 WHO. Novel Coronavirus(2019-nCoV) Situation Report. (2020).
- 234 9 Huang, C. *et al.* Clinical features of patients infected with 2019 novel coronavirus in Wuhan, China.  
235 *The Lancet*, doi:10.1016/s0140-6736(20)30183-5 (2020).
- 236 10 Michelle L. Holshue, C. D., Scott Lindquist, Kathy H. Lofy, John Wiesman, Hollianne Bruce,  
237 Christopher Spitters, for the Washington State 2019-nCoV Case Investigation Team. First Case of  
238 2019 Novel Coronavirus in the United States. (2020).
- 239 11 de Wit, E., van Doremalen, N., Falzarano, D. & Munster, V. J. SARS and MERS: recent insights  
240 into emerging coronaviruses. *Nature Reviews Microbiology* **14**, 523-534,  
241 doi:10.1038/nrmicro.2016.81 (2016).
- 242 12 Perlman, S. & Netland, J. Coronaviruses post-SARS: update on replication and pathogenesis. *Nature*  
243 *Reviews Microbiology* **7**, 439-450, doi:10.1038/nrmicro2147 (2009).
- 244 13 Xue, X. Y. *et al.* Production of authentic SARS-CoV M-pro with enhanced activity: Application as  
245 a novel tag-cleavage endopeptidase for protein overproduction. *Journal of Molecular Biology* **366**,  
246 965-975, doi:10.1016/j.jmb.2006.11.073 (2007).
- 247 14 Wang, Q. M., Johnson, R. B., Cox, G. A., Villarreal, E. C. & Loncharich, R. J. A Continuous  
248 Colorimetric Assay for Rhinovirus-14 3C Protease Using Peptidep-Nitroanilides as Substrates.  
249 *Analytical biochemistry* **252**, 238-245 (1997).
- 250 15 Yang, H. T. *et al.* Design of wide-spectrum inhibitors targeting coronavirus main proteases. *Plos*  
251 *Biology* **3**, 2044-2044, doi:10.1371/journal.pbio.0030428 (2005).
- 252 16 Xue, X. Y. *et al.* Structures of two coronavirus main proteases: Implications for substrate binding

- 253 and antiviral drug design. *Journal of Virology* **82**, 2515-2527, doi:10.1128/jvi.02114-07 (2008).
- 254 17 Ren, Z. L. *et al.* The newly emerged SARS-Like coronavirus HCoV-EMC also has an "Achilles'
- 255 heel": current effective inhibitor targeting a 3C-like protease. *Protein & Cell* **4**, 248-250,
- 256 doi:10.1007/s13238-013-2841-3 (2013).
- 257 18 Wang, F. H. *et al.* Michael Acceptor-Based Peptidomimetic Inhibitor of Main Protease from Porcine
- 258 Epidemic Diarrhea Virus. *Journal of Medicinal Chemistry* **60**, 3212-3216,
- 259 doi:10.1021/acs.jmedchem.7b00103 (2017).
- 260 19 Yang, H. T. *et al.* The crystal structures of severe acute respiratory syndrome virus main protease
- 261 and its complex with an inhibitor. *Proceedings of the National Academy of Sciences of the United*
- 262 *States of America* **100**, 13190-13195, doi:10.1073/pnas.1835675100 (2003).
- 263 20 Zhao, Q. *et al.* Structure of the main protease from a global infectious human coronavirus, HCoV-
- 264 HKU1. *Journal of virology* **82**, 8647-8655, doi:10.1128/JVI.00298-08 (2008).
- 265 21 Rubin, B. & Waugh, M. H. Antiphlogistic effects of antisero-tonin (SQ 10,643) and aminopyrine in
- 266 rats versus endotoxin and other agents. *Proceedings of the Society for Experimental Biology and*
- 267 *Medicine* **119**, 438-443 (1965).
- 268 22 Chen, L. *et al.* Cinanserin is an inhibitor of the 3C-like proteinase of severe acute respiratory
- 269 syndrome coronavirus and strongly reduces virus replication in vitro. *Journal of virology* **79**, 7095-
- 270 7103 (2005).
- 271 23 Lynch, E. & Kil, J. in *Seminars in Hearing*. 047-055 (© Thieme Medical Publishers).
- 272 24 Masaki, C. *et al.* Effects of the potential lithium-mimetic, ebselen, on impulsivity and emotional
- 273 processing. **233**, 2655-2661, doi:10.1007/s00213-016-4319-5 (2016).
- 274 25 Kil, J. *et al.* Safety and efficacy of ebselen for the prevention of noise-induced hearing loss: a
- 275 randomised, double-blind, placebo-controlled, phase 2 trial. *The Lancet* **390**, 969-979 (2017).
- 276 26 Koehler, D., Shah, Z. A. & Williams, F. E. The GSK3 $\beta$  inhibitor, TDZD-8, rescues cognition in a
- 277 zebrafish model of okadaic acid-induced Alzheimer's disease. *Neurochemistry international* **122**,
- 278 31-37 (2019).
- 279 27 Bedford, J. *et al.* A new twenty-first century science for effective epidemic response. *Nature* **575**,
- 280 130-136, doi:10.1038/s41586-019-1717-y (2019).
- 281 28 Farha, M. A. & Brown, E. D. Drug repurposing for antimicrobial discovery. *Nature Microbiology* **4**,
- 282 565-577, doi:10.1038/s41564-019-0357-1 (2019).
- 283 29 Xu, M. *et al.* Identification of small-molecule inhibitors of Zika virus infection and induced neural
- 284 cell death via a drug repurposing screen. *Nature Medicine* **22**, 1101-1107, doi:10.1038/nm.4184
- 285 (2016).
- 286 30 Aulner, N., Danckaert, A., Ihm, J., Shum, D. & Shorte, S. L. Next-Generation Phenotypic Screening
- 287 in Early Drug Discovery for Infectious Diseases. *Trends in parasitology* (2019).
- 288 31 Wang, F., Chen, C., Tan, W., Yang, K. & Yang, H. Structure of Main Protease from Human
- 289 Coronavirus NL63: Insights for Wide Spectrum Anti-Coronavirus Drug Design. *Sci Rep* **6**, 22677-
- 290 22677, doi:10.1038/srep22677 (2016).
- 291 32 Lee, C.-C. *et al.* Structural basis of inhibition specificities of 3C and 3C-like proteases by zinc-
- 292 coordinating and peptidomimetic compounds. *J Biol Chem* **284**, 7646-7655,
- 293 doi:10.1074/jbc.M807947200 (2009).
- 294 33 Wang, F. H. *et al.* Crystal Structure of Feline Infectious Peritonitis Virus Main Protease in Complex
- 295 with Synergetic Dual Inhibitors. *Journal of Virology* **90**, 1910-1917, doi:10.1128/jvi.02685-15
- 296 (2016).
- 297 34 Cui, W. *et al.* The crystal structure of main protease from mouse hepatitis virus A59 in complex with
- 298 an inhibitor. *Biochemical and Biophysical Research Communications* **511**, 794-799,
- 299 doi:10.1016/j.bbrc.2019.02.105 (2019).
- 300 35 Needle, D., Lountos, G. T. & Waugh, D. S. Structures of the Middle East respiratory syndrome
- 301 coronavirus 3C-like protease reveal insights into substrate specificity. *Acta Crystallographica*
- 302 *Section D-Structural Biology* **71**, 1102-1111, doi:10.1107/s1399004715003521 (2015).
- 303

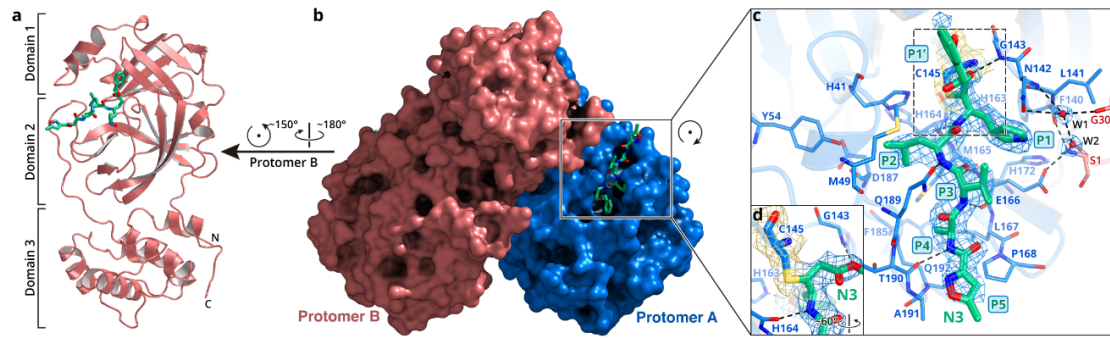

**Fig. 1 | The crystal structure of COVID-19 M<sup>pro</sup> in complex with N3.**

**a**, Cartoon representation of one protomer of the dimeric M<sup>pro</sup>-inhibitor complex. N3 is shown in green sticks. **b**, Surface representation of the homodimer of M<sup>pro</sup>. Protomer A is in blue while Protomer B in salmon; N3 is presented as green sticks. **c**, A zoomed view of the substrate-binding pocket. The key residues forming the binding pocket are shown in sticks; the two waters, assigned as W1 and W2, are shown as red spheres; the  $2F_o - F_c$  density map contoured at  $1.2 \sigma$  is shown around N3 molecule (blue mesh), C145-A (yellow mesh), and the two waters (blue mesh). **d**, The C-S covalent bond.

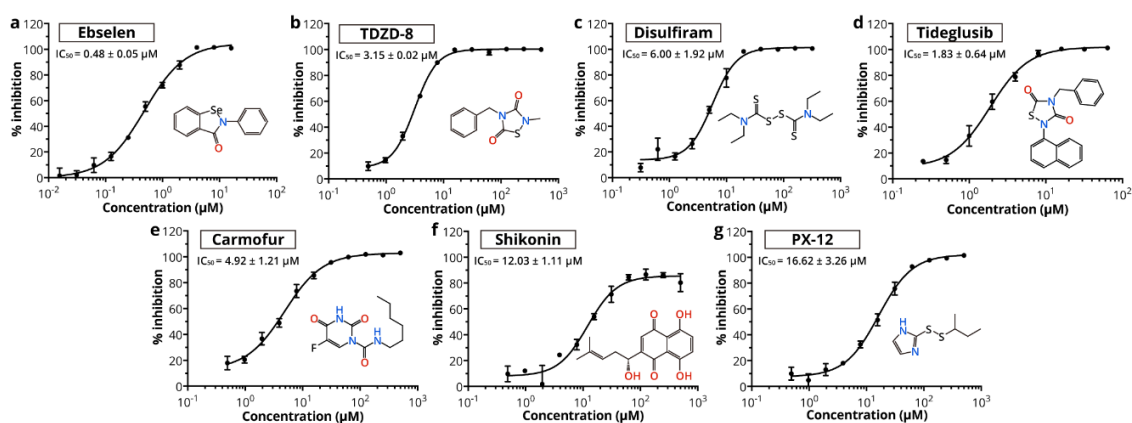

313

314 **Fig. 2 | Plots showing the inhibitory activity for the seven drug leads.** The hydrolytic activity of  
315 COVID-19 M<sup>Pro</sup> is measured in the presence of varying concentrations of compounds. Curves represent  
316 best fits for calculating the IC<sub>50</sub> values, error bars represent mean ± SEM based on three independent  
317 measurements.

318

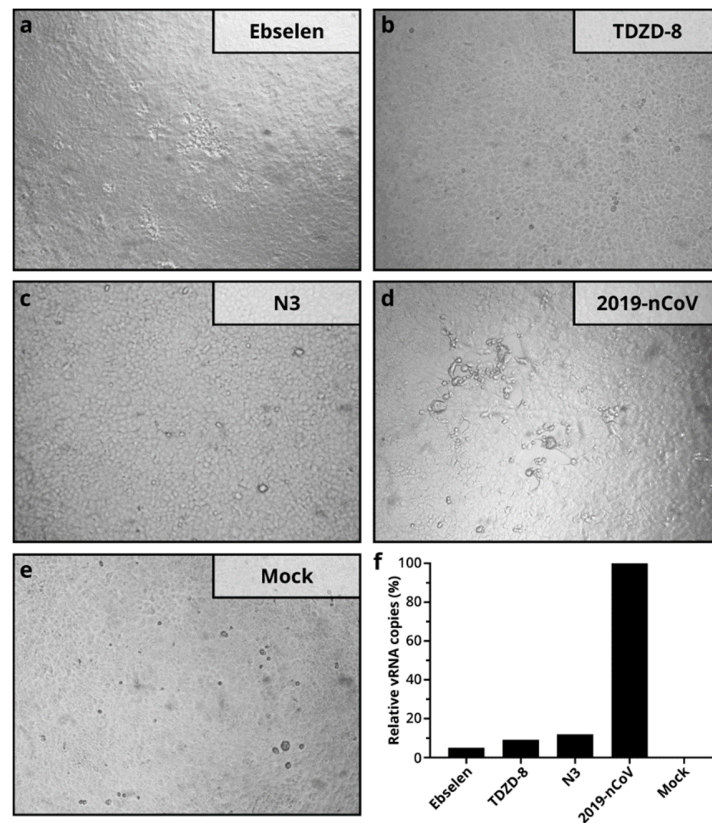

319

320 **Fig. 3 | Antiviral activity assay.** Virus-induced cytopathic effect in Vero cells in the presence of M<sup>Pro</sup>  
321 inhibitors. **a-c**, Treated with Ebselen, TDZD-8 and N3 respectively. **d**, Cells infected with COVID-19.  
322 **e**, Mock-infection with DMSO (0.1%). **f**, The relative concentration of vRNA present in the supernatant  
323 at 72 h post infection (p.i.) determined by qRT-PCR analysis.

324

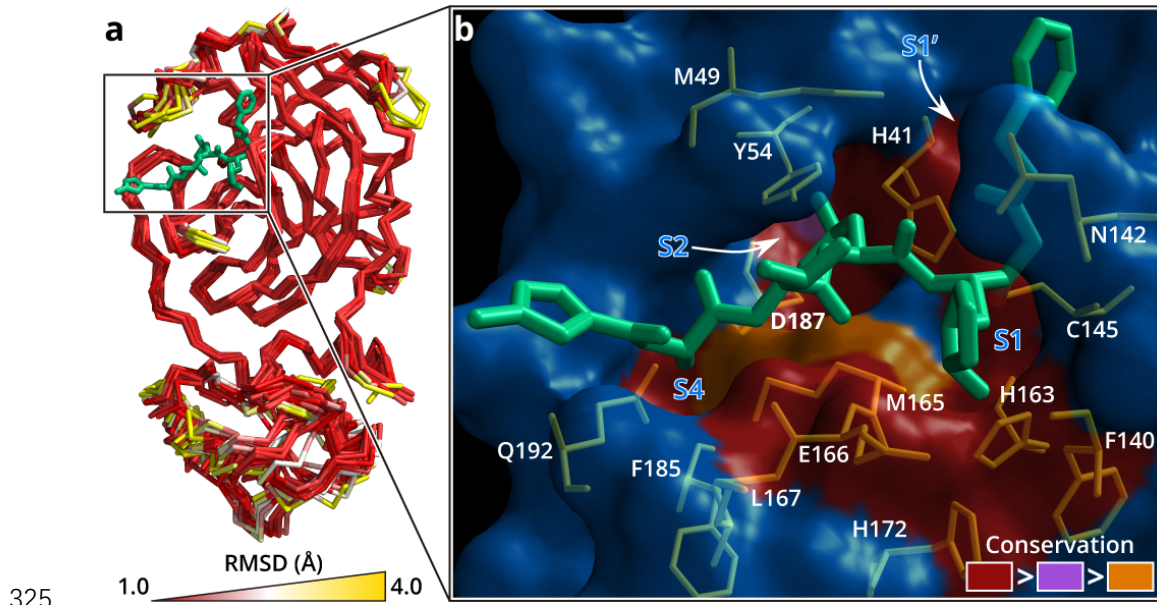

325

326 **Fig. 4 | The substrate-binding pocket of M<sup>pro</sup>s is conserved among 12 different CoVs.**

327 **a**, Superposition of crystal structures of M<sup>pro</sup>s (C $\alpha$  1-300) from 12 CoVs, including COVID-19, SARS-  
328 CoV, MERS-CoV, HCoV-HKU1, BtCoV-HKU4, MHV-A59, PEDV, FIPV, TGEV, HCoV-NL63,  
329 HCoV-229E and IBV. The color spectrum represents the root-mean-square deviation (RMSD) of the  
330 aligned C $\alpha$  atoms. **b**, Surface presentation of conserved substrate-binding pockets of 12 CoV M<sup>pro</sup>s. N3  
331 is shown as green sticks; the background (blue) is the surface of COVID-19 M<sup>pro</sup>. Red: residues are  
332 entirely identical among all 12 M<sup>pro</sup>s; violet: conserved substitution in one CoV M<sup>pro</sup>; orange: conserved  
333 substitution in more than one CoV M<sup>pro</sup>s. S1, S2, S4, and S1' subsites are indicated.

334

335 **Methods**

336 **Cloning, protein expression and purification**

337 The full-length gene encoding COVID-19 M<sup>pro</sup> was optimized and synthesized for  
338 *Escherichia coli* expression (GENEWIZ). Cloning strategy for producing authentic viral  
339 M<sup>pro</sup> has been reported previously<sup>13</sup>. The expression plasmid was transformed into  
340 *Escherichia coli* BL21 (DE3) cells and then cultured in Luria broth (LB) media containing  
341 100 µg/mL ampicillin at 37°C, 220 rpm. When the cells were grown to OD<sub>600</sub> of 0.6-0.8,  
342 0.5 mM IPTG was added to the cell culture to induce the expression of the recombinant  
343 COVID-19 M<sup>pro</sup> at 16°C, 180 rpm. After 10 hours, the cells were harvested by  
344 centrifugation at 3,000×g for 20 min.

345 The cell pellets were resuspended in lysis buffer (20 mM Tris-HCl, pH 8.0, 300 mM NaCl),  
346 lysed by high-pressure homogenization, and then centrifuged at 25,000×g for 40 min. The  
347 supernatant was loaded onto Ni-NTA affinity column (QIAGEN), and washed by the  
348 resuspension buffer containing 20 mM imidazole. The His tagged M<sup>pro</sup> was eluted by  
349 cleavage buffer (50 mM Tris-HCl, pH 7.0, 150 mM NaCl) including 300 mM imidazole.  
350 Human rhinovirus 3C protease was added to remove the C-terminal His tag. The COVID-  
351 19 M<sup>pro</sup> was further purified by anion-exchange chromatography and size-exclusion  
352 chromatography (Superdex 200, GE Healthcare). The purified COVID-19 M<sup>pro</sup> was stored  
353 in 50 mM Tris-HCl, pH 7.3, 1 mM EDTA.

354 **Crystallization**

355 COVID-19 M<sup>pro</sup> was incubated with 10 mM N3 for 30 min and the complex (5 mg/ml) was  
356 crystallized by hanging drop vapor diffusion method at 20°C. The best crystals were grown  
357 with well buffer containing 2% polyethylene glycol (PEG) 6000, 3% DMSO, 1 mM DTT,



358 0.1 M MES (pH 6.0). The cryo-protectant solution contained 30% PEG 400, 0.1 M MES  
359 (pH 6.0).

### 360 **Data collection and structure determination**

361 X-ray data were collected on beamline BL17U1 at Shanghai Synchrotron Radiation  
362 Facility (SSRF) at 100 K and at a wavelength of 1.07180 Å using an Eiger X 16M image  
363 plate detector. Data integration and scaling were performed using the program Xia2. The  
364 structure was determined by molecular replacement (MR) with the Phaser module<sup>36</sup> in  
365 CCP4<sup>37</sup> using the SARS-CoV M<sup>pro</sup> (PDB ID: 2H2Z) as a search template. The output model  
366 from MR was subsequently subjected to iterative cycles of manual model adjustment with  
367 Coot<sup>38</sup> and refinement was finished with Phenix<sup>39</sup>. The inhibitor N3 was built according to  
368 the omit map. The phasing and refinement statistics are summarized in Extended Data  
369 Table 1. The  $R_{work}/R_{free}$  values are 0.202/0.235, respectively. 97.3% residues are in most  
370 favored regions of the Ramachandran plot, and no residues are found in disallowed regions.  
371 Coordinates and structure factors for COVID-19 M<sup>pro</sup> in complex with the inhibitor N3  
372 have been deposited in Protein Data Bank with accession number 6LU7.

### 373 **Enzymatic activity and inhibition assays**

374 The enzyme activity assays have been described previously<sup>13</sup>. Briefly, the activity of  
375 COVID-19 M<sup>pro</sup> was measured by continuous kinetic assay, with the substrate MCA-  
376 AVLQSGFR-Lys(Dnp)-Lys-NH<sub>2</sub> (GL Biochem Shanghai Ltd), using wavelengths of 320  
377 and 405 nm for excitation and emission, respectively. The assays started by immediately  
378 mixing 0.2 µM COVID-19 M<sup>pro</sup> with different concentrations of substrate (2.5-100 µM).  
379 Fluorescence intensity was monitored with EnVision multimode plate reader  
380 (PerkinElmer). Initial rates were obtained by fitting the linear portion of the curves (usually

381 the first 3 min of the assay curves) to a straight line. The kinetic parameters  $K_m$  and  $k_{cat}$   
382 were calculated from a double-reciprocal plot. As N3 is a mechanism-based irreversible  
383 inhibitor for COVID-19 M<sup>pro</sup>,  $k_{obs}/[I]$  was used as an approximation of the pseudo second-  
384 order rate constant to evaluate the inhibition effect of the inhibitor N3<sup>15</sup>. In this case, the  
385 measurement was carried out with 0.2  $\mu$ M of enzyme, 20  $\mu$ M of substrate and inhibitor at  
386 6 different concentrations (0-1  $\mu$ M).

### 387 **Virtual screening**

388 The virtual screening was performed using our in-house database via a workflow  
389 application of Glide (v8.2)<sup>40</sup>, which is a module of molecular simulation software package,  
390 Maestro (Schrodinger 2019-1a). All compounds in the database were considered to be at  
391 pH  $7.4 \pm 0.2$  to estimate their protonation state using the program EpiK<sup>41</sup>. Their three  
392 dimensional conformations were generated by the ligPrep module of Maestro. The newly  
393 obtained complex structure of COVID-19 M<sup>pro</sup> (PDB ID: 6LU7) was used to generate  
394 receptor grid for docking simulations. The center of active site of the grid was determined  
395 according to the N3 in the structure. The flexibility of the receptor hydroxyl and thiol  
396 groups in side chains of C145, S46 and Y54 were considered. At the very beginning, a  
397 relatively fast but raw screening was performed by using the glide standard precision model,  
398 and the top 20% of compounds were kept. Then covalent docking simulations were  
399 performed by choosing Michael Addition as the reaction type for these top 20% compounds  
400 that contained Michael acceptors, and C145 was set as the source of Michael donor. Finally,  
401 the candidate molecules were picked out by analysing the predicted binding modes and  
402 their scores.

### 403 **High-throughput drug screen and IC<sub>50</sub> measurement**

404 Potential inhibitors against COVID-19 M<sup>Pro</sup> were screened by enzymatic inhibition assay.  
405 When different compounds were added into the enzymatic reaction, the change of initial  
406 rates was calculated to evaluate their inhibitory effect. Five drug libraries, Approved Drug  
407 Library (TargetMol, USA), Clinic Compound Library (TargetMol, USA), FDA-approved  
408 Drug Library (Selleck, USA), Natural Product Library (Selleck, USA), and Anti-virus drug  
409 library (Shanghai Institute for Advanced Immunochemical Studies, SIAIS), which includes  
410 ~ 10,000 compounds, were used. The preliminary screening reaction mixture included 0.2  
411  $\mu$ M protein, 20  $\mu$ M substrate and 50  $\mu$ M compounds. The compounds of interest were  
412 defined as those with a percentage of inhibition over 60% compared with the reaction in  
413 the absence of inhibitor. IC<sub>50</sub> values were measured at 12 concentrations and three  
414 independent experiments were performed. All experimental data was analyzed using  
415 GraphPad Prism software.

#### 416 **Molecular docking**

417 To understand the binding interaction of these molecules with COVID-19 M<sup>Pro</sup>, two  
418 different molecular docking methods, i.e., Glide (v8.2)<sup>40</sup> and iFitDock<sup>42</sup> were used to  
419 predict their binding poses. Then a 3D molecular similarity calculation method, SHAFTs<sup>43</sup>,  
420 was used for molecular alignment poses enumeration by matching the critical  
421 pharmacophore and volumetric overlay between the N3 molecule within the M<sup>Pro</sup> structure  
422 and the seven drug candidates. However, the selenium atom of ebselen could not be treated  
423 by any of these above methods, so sulfur was used to replace it in the calculations. Then  
424 the obtained optimal superposition of these molecules were used to assist the reasonability  
425 of the predicted binding poses from the two docking methods, and only the binding  
426 orientations which were consistent among different methods were kept for constructing the

427 initial complexes. Finally, these complexes were further optimized (refined binding poses  
428 are illustrated in Extended Data Fig. 4) and re-scored (shown in Extended Data Table 2) by  
429 using MM-GBSA module<sup>44</sup> of Schrödinger, and the residues within 5 Å around the ligand  
430 were refined.

#### 431 **Antiviral assay for compounds identified from high-throughput screening**

432 Vero (African green monkey kidney) cells were incubated at 37°C in Dulbecco's modified  
433 Eagle's medium (DMEM; Invitrogen) with 10% fetal bovine serum (FBS), 100 U/mL  
434 penicillin, and 100 µg/mL streptomycin.

435 The COVID-19 was originally isolated from a throat swab specimen from a pneumonia  
436 patient and amplified in Vero cells. The *in vitro* antiviral effects of the selected compounds  
437 in Vero cells were assayed as previously described<sup>45</sup>. Briefly, cultured Vero cells were  
438 infected with COVID-19 in the presence of each compounds at the concentration of 10 µM.  
439 Cells were then cultured for 72 hours, and the CPE was observed daily and viral RNA copy  
440 numbers in supernatants were quantified by in the COVID-19-specific qRT-PCR.

#### 441 **Antiviral assay for cinanserin**

442 Vero E6 cell line was obtained from American Type Culture Collection (ATCC) and  
443 maintained in Dulbecco's Modified Eagle Medium (DMEM; Gibco Invitrogen)  
444 supplemented with 10% fetal bovine serum (FBS; Gibco Invitrogen) at 37 °C in a  
445 humidified atmosphere of 5% CO<sub>2</sub>. A clinical isolate COVID-19<sup>3</sup> was propagated in Vero  
446 E6 cells, and viral titer was determined as described previously<sup>45</sup>. All the infection  
447 experiments were performed at biosafety level-3 (BLS-3).

448 Pre-seeded Vero E6 cells ( $5 \times 10^4$  cells/well) were pre-treated with the different  
449 concentration of the indicated compounds for 1 hour and the virus was subsequently added

450 (MOI of 0.05) to allow infection for 2 hours. Then, the virus-drug mixture was removed  
451 and cells were further cultured with fresh drug containing medium. At 24 h p.i., the cell  
452 supernatant was collected and viral RNA in supernatant was subjected to qRT-PCR analysis.

453

- 454 36 McCoy, A. J. *et al.* Phasercrystallographic software. *Journal of Applied Crystallography* **40**, 658-  
455 674, doi:10.1107/s0021889807021206 (2007).
- 456 37 Potterton, L. *et al.* CCP4i2: the new graphical user interface to the CCP4 program suite. *Acta*  
457 *Crystallographica Section D-Structural Biology* **74**, 68-84, doi:10.1107/s2059798317016035  
458 (2018).
- 459 38 Emsley, P., Lohkamp, B., Scott, W. G. & Cowtan, K. Features and development of Coot. *Acta*  
460 *Crystallographica Section D: Biological Crystallography* **66**, 486-501 (2010).
- 461 39 Afonine, P. V. *et al.* Towards automated crystallographic structure refinement with phenix.refine.  
462 *Acta Crystallographica Section D-Structural Biology* **68**, 352-367,  
463 doi:10.1107/s0907444912001308 (2012).
- 464 40 Friesner, R. A. *et al.* Glide: A new approach for rapid, accurate docking and scoring. 1. Method and  
465 assessment of docking accuracy. *Journal of Medicinal Chemistry* **47**, 1739-1749,  
466 doi:10.1021/jm0306430 (2004).
- 467 41 Greenwood, J. R., Calkins, D., Sullivan, A. P. & Shelley, J. C. Towards the comprehensive, rapid,  
468 and accurate prediction of the favorable tautomeric states of drug-like molecules in aqueous solution.  
469 *Journal of computer-aided molecular design* **24**, 591-604 (2010).
- 470 42 Bai, F. *et al.* Free energy landscape for the binding process of Huperzine A to acetylcholinesterase.  
471 *Proceedings of the National Academy of Sciences of the United States of America* **110**, 4273-4278,  
472 doi:10.1073/pnas.1301814110 (2013).
- 473 43 Liu, X. F., Jiang, H. L. & Li, H. L. SHAFTS: A Hybrid Approach for 3D Molecular Similarity  
474 Calculation. 1. Method and Assessment of Virtual Screening. *Journal of Chemical Information and*  
475 *Modeling* **51**, 2372-2385, doi:10.1021/ci200060s (2011).
- 476 44 Guimaraes, C. R. W. & Cardozo, M. MM-GB/SA rescoring of docking poses in structure-based lead  
477 optimization. *Journal of Chemical Information and Modeling* **48**, 958-970, doi:10.1021/ci800004w  
478 (2008).
- 479 45 Wang, M. *et al.* Remdesivir and chloroquine effectively inhibit the recently emerged novel  
480 coronavirus (2019-nCoV) in vitro. *Cell Research*, doi:10.1038/s41422-020-0282-0 (2020).

481

482 **Acknowledgments** We would like to thank Ying Lei and Juan Kong from High Throughput  
483 Platform, staff from Analytical Chemistry Platform at Shanghai Institute for Advanced  
484 Immunochemical Studies, for their technical support. We are grateful to National Centre  
485 for Protein Science Shanghai and The Molecular and Cell Biology Core Facility of the  
486 School of Life Science and Technology, ShanghaiTech University for use of their  
487 instrumentation and technical assistance. We thank Prof. Wenqing Xu, Prof. Zhijie Liu, and  
488 Haixia Su for discussion. We also thank the staff from beamlines BL17U1, BL18U1 and  
489 BL19U1 at Shanghai Synchrotron Radiation Facility (China). This work was supported by  
490 grants from National Key R&D Program of China (grant No. 2017YFC0840300) and

491 Project of International Cooperation and Exchanges NSFC (grant No. 81520108019) to  
492 Z.R..

493 **Author contributions** Z.R. and H.Y. conceived the project. Z.J., H.J., Z.R., and H.Y.  
494 designed the experiments; Z.J., X.D., Y.X., Y.D., M.L., Y.Z., B.Z., X. Li, L.Z., Y.D., J.Y.,  
495 F.L., T.Y., Xiaoce Liu and X.Y. performed the experiments. Z.J., B.Z. and F.L. collected  
496 the diffraction data. B.Z. and Xiang Liu solved the crystal structure. Z.J., X.D., Y.X., K.Y.,  
497 F.B., H.L., Xiang Liu, L.G., G.X., C.Q., Z.S., H.J., Z.R. and H.Y. analyzed and discussed  
498 the data. Z.J., X.D., F.B., Xiang Liu, L.G., G.X., C.Q., Z.S., H.J., Z.R. and H.Y wrote the  
499 manuscript.

500 **Competing interests** The authors declare no competing interests.

501 **Data and materials availability:** The PDB accession No. for the coordinates of COVID-  
502 19 M<sup>P10</sup> in complex with N3 is 6LU7 (Deposited: 2020-01-26; Released: 2020-02-05).

503

504

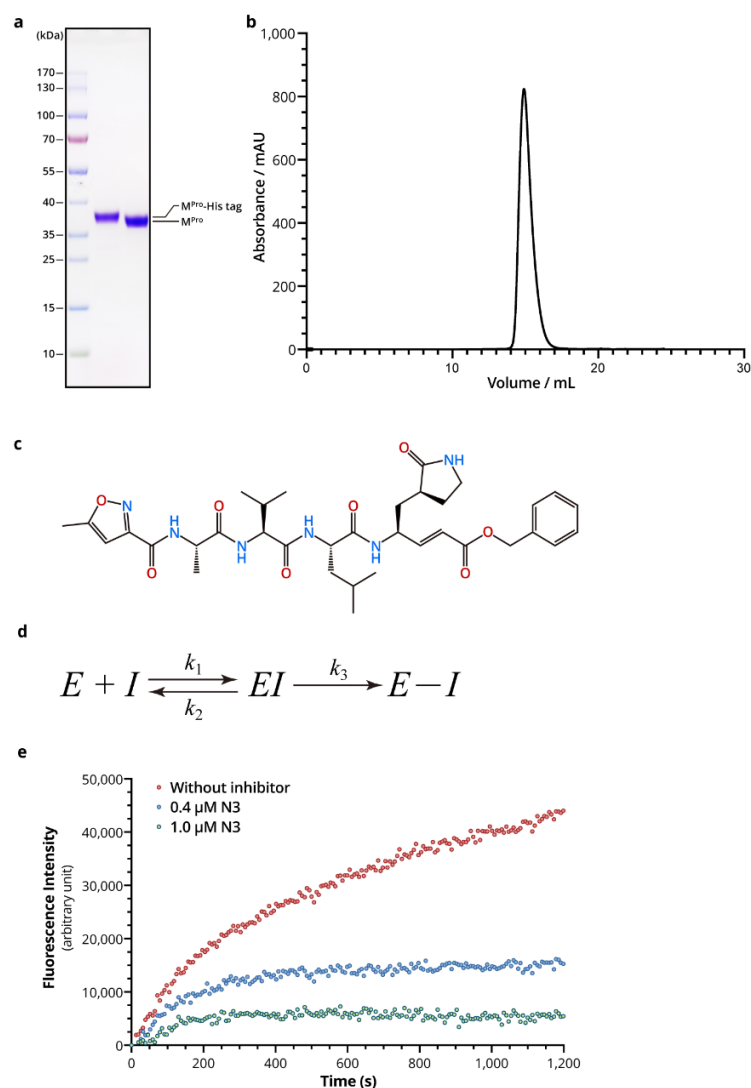

505  
506

**Extended Data Fig. 1 | The purification of COVID-19 M<sup>Pro</sup> and the inhibitory assay of N3**

507

**compound.** **a**, the SDS-PAGE gel of COVID-19 M<sup>Pro</sup>. The first lane: marker; the second lane: M<sup>Pro</sup>

508

before treating with rhinovirus 3C protease; third lane: the M<sup>Pro</sup> after the cleavage of C-terminal tag. **b**,

509

Size-exclusion chromatography profile of M<sup>Pro</sup>. **c**, The chemical structure of N3 inhibitor. **d**, Inhibition

510

mechanism for N3. **e**, Typical inhibition curves for N3.

511

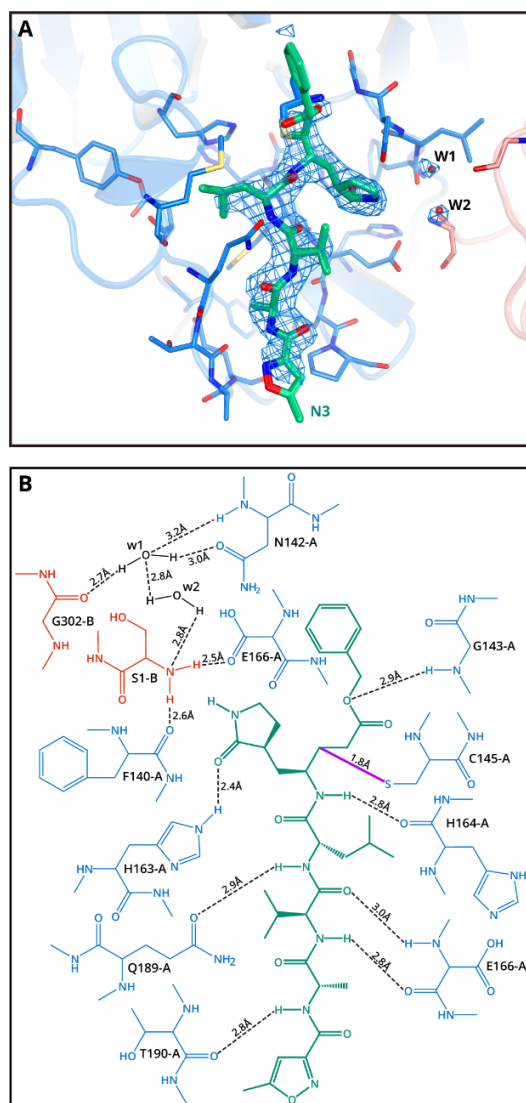

512  
513 **Extended Data Fig. 2 | The interactions between M<sup>Pro</sup> and N3.** **a**, The  $F_o-F_c$  omit map (contour level  
514 = 3  $\sigma$ , shown as the blue mesh). **b**, Detailed view of the interactions between the N3 and COVID-19  
515 M<sup>Pro</sup>. The hydrogen bonds are shown as black dashed lines. The covalent bond between N3 and C145-  
516 A is in purple.  
517



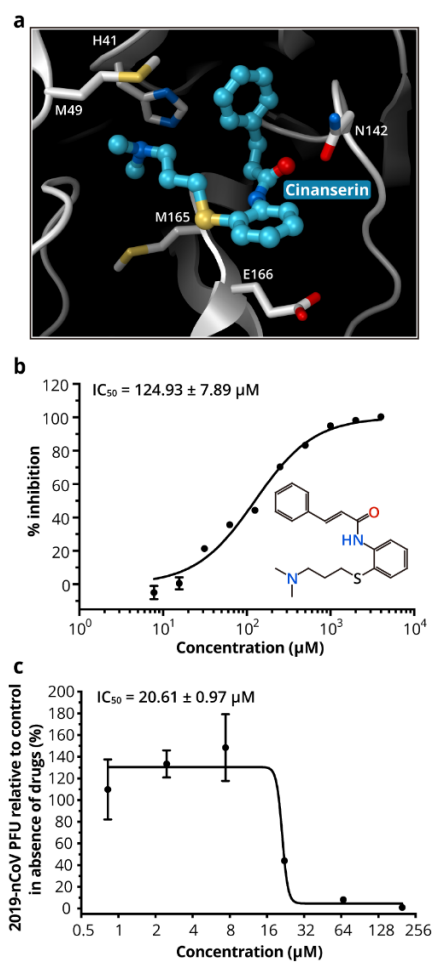

518

519 **Extended Data Fig. 3 | Cinanserin is an inhibitor for M<sup>pro</sup>.** **a**, The docking result of cinanserin. The  
520 structure of COVID-19 M<sup>pro</sup> is shown as a white cartoon; cinanserin is shown as cyan sticks and balls;  
521 residues predicted to be interacting with cinanserin are shown as sticks. **b**, Inhibition of cinanserin on  
522 M<sup>pro</sup>. **c**, Antiviral activity of cinanserin.

523

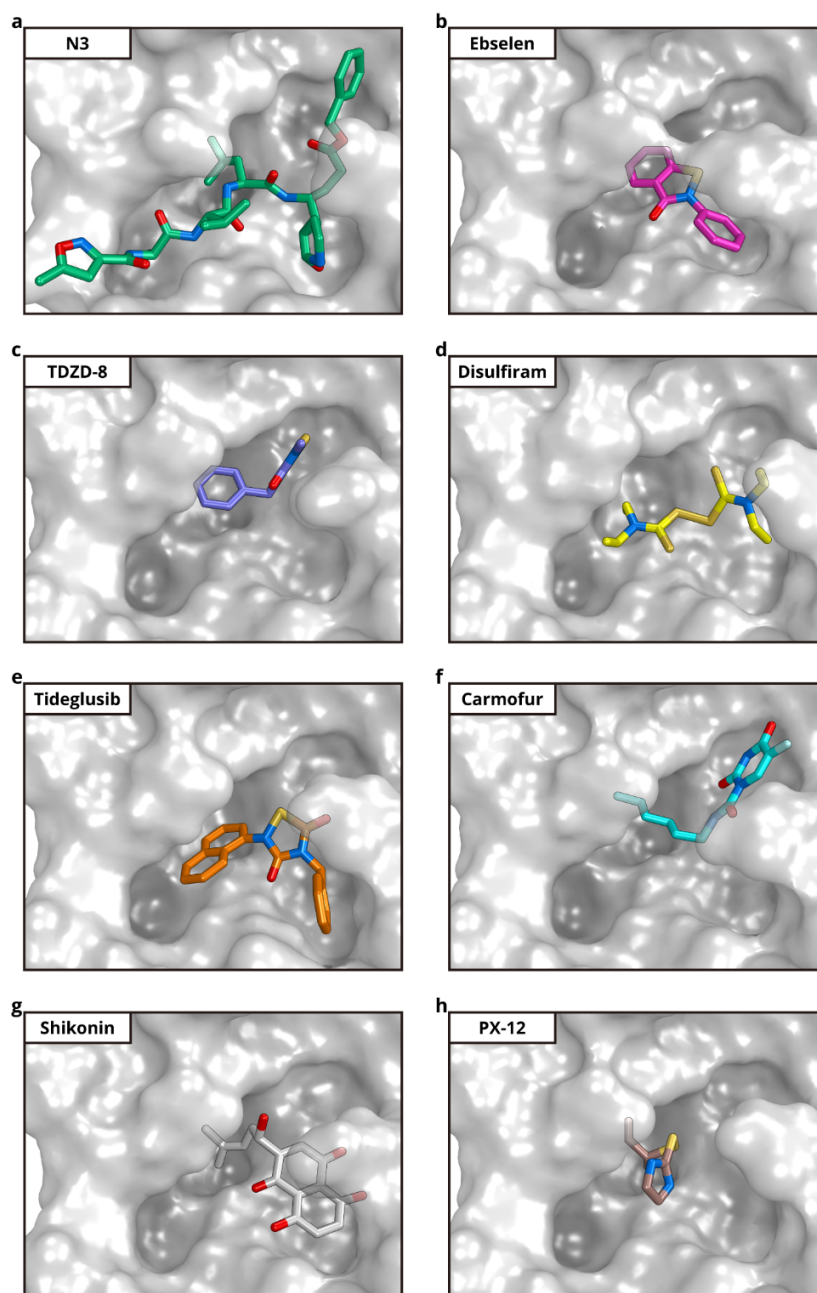

524

525

526

527

528

**Extended Data Fig. 4 | Docking Poses of different COVID-19 M<sup>Pro</sup> inhibitors.** The docking results show that the inhibitors identified through the high-throughput screening are likely to occupy the same pocket as N3.

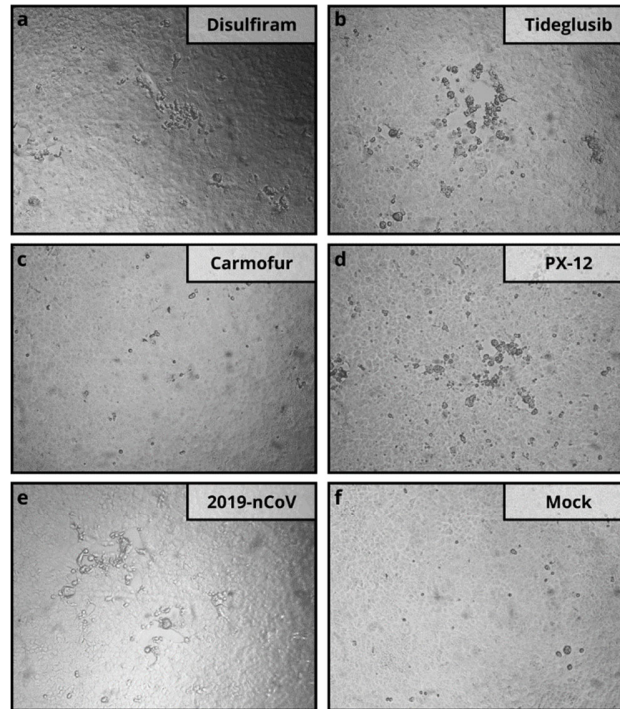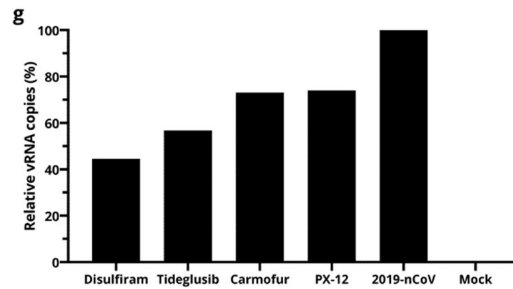

529

530 **Extended Data Fig. 5 | Virus-induced CPE in Vero cells treated with M<sup>pro</sup> inhibitors. a-d,**

531 **treated with disulfiram, tideglusib, carmofur and PX-12 respectively; e, Cells infected with COVID-19; f,**

532 **Mock-infection with DMSO (0.1%). g, The relative concentration of vRNA present in the supernatant**

533 **at 72h p.i. determined by qRT-PCR analysis. Because shikonin showed cellular toxicity at the test**

534 **concentration, its antiviral activity assay did not further proceed.**

535

536 **Extended Data Table 1 | Data collection and refinement statistics**  
537

---

PDB code: 6LU7

---

| <b>Data collection</b>                              |                        |
|-----------------------------------------------------|------------------------|
| Space group                                         | C2                     |
| Cell dimensions                                     |                        |
| <i>a</i> , <i>b</i> , <i>c</i> (Å)                  | 97.931, 79.477, 51.803 |
| $\alpha$ , $\beta$ , $\gamma$ (°)                   | 90, 114.55, 90         |
| Resolution (Å)                                      | 50.00-2.16 (2.22-2.16) |
| <i>R</i> <sub>merge</sub>                           | 18.9 (147.2)           |
| <i>I</i> / $\sigma I$                               | 6.3 (3.2)              |
| Completeness (%)                                    | 100.0 (100.0)          |
| Redundancy                                          | 6.6 (6.1)              |
| <b>Refinement</b>                                   |                        |
| Resolution (Å)                                      | 50.00-2.16             |
| No. reflections                                     | 19455 (1431)           |
| <i>R</i> <sub>work</sub> / <i>R</i> <sub>free</sub> | 0.2020/0.2350          |
| No. atoms                                           |                        |
| Protein                                             | 2367                   |
| Ligand/ion                                          | 49                     |
| Water                                               | 84                     |
| <i>B</i> -factors                                   |                        |
| Protein                                             | 42.7                   |
| Ligand/ion                                          | 46.3                   |
| Water                                               | 44.2                   |
| R.m.s. deviations                                   |                        |
| Bond lengths (Å)                                    | 0.002                  |
| Bond angles (°)                                     | 0.474                  |

---

538 \*Values in parentheses are for highest-resolution shell.  
539

540 **Extended Data Table 2 | Predicted binding affinities for the drug leads to COVID-19 M<sup>Pro</sup> by**  
541 **using MM-GBSA module integrated in Schrödinger**  
542

| Drug       | Predicted $\Delta G_{\text{bind}}$ (kcal/mol) |
|------------|-----------------------------------------------|
| PX-12      | -50.84                                        |
| Shikonin   | -67.95                                        |
| TDZD-8     | -43.77                                        |
| Tideglusib | -61.79                                        |
| Carmofur   | -47.12                                        |
| Ebselen    | -53.83                                        |
| Disulfiram | -46.16                                        |

543
